# Supplementary material for: OncotRF: an online resource for exploration of tRNA-derived fragments in human cancers
Source: PubMed Central journal article supplement — RNA Biol. 2020 Jun 28;17(8):1081–91. doi: 10.1080/15476286.2020.1776506 (PMC7577240; doi:10.1080/15476286.2020.1776506), 2020-06-28
Supplement: KRNB_A_1776506_SM3563.pdf [file KRNB_A_1776506_SM3563.pdf]

# **OncotRF: an online resource for exploration of tRNA-derived fragments in human cancers**

Dongxia Yao, Xiwei Sun, Liyuan Zhou, Md. Amanullah, Xiaoqing Pan, Yong Liu, Mingyu

Liang, Pengyuan Liu and Yan Lu

## **Supplementary Data**

### Search Results for keyword 'bladder cancer':

- tRF expression in BLCA, click the link of each tRF type for details:

[3'U-tRF](#)

[3'-tRF](#)

[5'-tRF](#)

[i-tRF](#)

- Differential expression analysis, click the link of each tRF type for details:

[3'U-tRF](#)

[3'-tRF](#)

[5'-tRF](#)

[i-tRF](#)

- Survival analysis, click the link of each tRF type for details:

[3'U-tRF](#)

[3'-tRF](#)

[5'-tRF](#)

[i-tRF](#)

**Figure S1. Search results for keyword “bladder cancer”.**

**There is a gene for keyword 'CALD1'.**

Show  entries Search:

| Gene  | Cancer | tRF                           | Correlation | Pvalue    | Qvalue    |
|-------|--------|-------------------------------|-------------|-----------|-----------|
| CALD1 | BLCA   | 3'U-mito-tRNA-Val-TAC_L22     | -0.606      | 8.564e-33 | 9.697e-29 |
| CALD1 | BLCA   | 3'U-mito-tRNA-Val-TAC_L21     | -0.597      | 1.276e-31 | 9.790e-28 |
| CALD1 | BLCA   | 3'U-mito-tRNA-Val-TAC_L23     | -0.574      | 7.481e-29 | 2.481e-25 |
| CALD1 | BLCA   | 3'U-mito-tRNA-Ile-GAT_L21     | -0.539      | 5.408e-25 | 6.845e-22 |
| CALD1 | BLCA   | i-mito-tRNA-Gln-TTG_L21_pos49 | -0.539      | 5.408e-25 | 2.633e-20 |
| CALD1 | BLCA   | 3'U-mito-tRNA-Cys-GCA_L23     | -0.507      | 6.875e-22 | 4.667e-19 |
| CALD1 | BLCA   | 3'U-mito-tRNA-Val-TAC_L24     | -0.507      | 7.484e-22 | 5.025e-19 |
| CALD1 | BLCA   | 5'-M-tRNA-Tyr-GTA-chr21-2_L30 | -0.468      | 1.771e-18 | 2.770e-15 |
| CALD1 | BLCA   | 3'U-mito-tRNA-Trp-TCA_L21     | -0.467      | 2.183e-18 | 7.169e-16 |
| CALD1 | BLCA   | 5'-mito-tRNA-Lys-TT_L23       | -0.464      | 4.095e-18 | 5.727e-15 |

Showing 1 to 10 of 42 entries Previous | 2 3 4 5 Next

**Figure S2. Search results for keyword “CALD1”.**

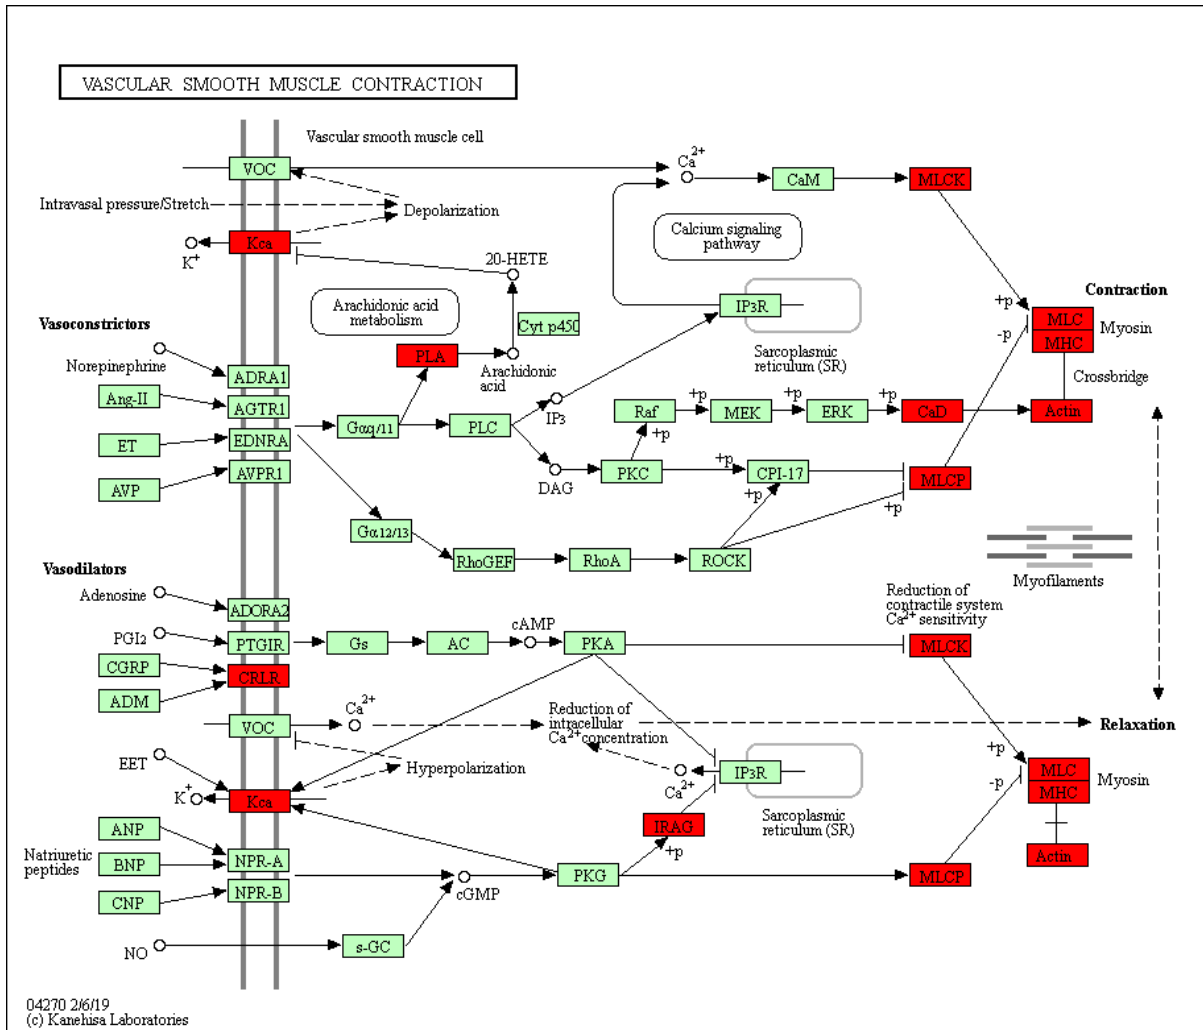

**Figure S3. The KEGG pathway “Vascular smooth muscle contraction”.** Genes with red background were significantly dysregulated in BLCA and had a strong correlation with differentially expressed tRFs in BLCA.

**Browse Analysis**

- Differential Expression Analysis
- Survival Analysis
  - tRF
    - 3U-IRF
      - 3U-M-mito-tRNA-Tyr-GTA\_L20
      - 3U-M-mito-tRNA-Tyr-GTA\_L22
      - 3U-M-tRNA-Gly-GCC-4-1\_L16
      - 3U-M-tRNA-Gly-GCC-4-1\_L17
      - 3U-M-tRNA-Gly-TCC-2-5\_L15
      - 3U-M-tRNA-His-GTG-1-4\_L23
      - 3U-M-tRNA-His-GTG-1-4\_L24
      - 3U-M-tRNA-His-GTG-1-4\_L25
      - 3U-M-tRNA-His-GTG-1-4\_L30
      - 3U-mito-tRNA-Asp-GTC\_L20
      - 3U-mito-tRNA-Asp-GTC\_L21
      - 3U-mito-tRNA-Asp-GTC\_L23
      - 3U-mito-tRNA-Asp-GTC\_L28
      - 3U-mito-tRNA-Cys-GCA\_L15
      - 3U-mito-tRNA-Cys-GCA\_L16
      - 3U-mito-tRNA-Cys-GCA\_L17
      - 3U-mito-tRNA-Cys-GCA\_L18
      - 3U-mito-tRNA-Cys-GCA\_L20
      - 3U-mito-tRNA-Cys-GCA\_L21
      - 3U-mito-tRNA-Cys-GCA\_L23
      - 3U-mito-tRNA-Cys-GCA\_L25
      - 3U-mito-tRNA-Cys-GCA\_L26
      - 3U-mito-tRNA-Cys-GCA\_L29
      - 3U-mito-tRNA-Ile-GAT\_L15
      - 3U-mito-tRNA-Ile-GAT\_L17
      - 3U-mito-tRNA-Ile-GAT\_L18
      - 3U-mito-tRNA-Ile-GAT\_L19
      - 3U-mito-tRNA-Ile-GAT\_L20

### 3'U-M-mito-tRNA-Tyr-GTA\_L20 Survival Analysis

**Overall Survival Analysis**

Show 10 entries

| Cancer | Logtest Pvalue | Logtest Qvalue | HR    | Lower | Upper |
|--------|----------------|----------------|-------|-------|-------|
| ACC    | 1.593e-3       | 0.015          | 0.335 | 0.148 | 0.757 |
| BRCA   | 0.132          | 0.422          | 0.875 | 0.734 | 1.044 |
| KIRC   | 0.683          | 0.788          | 0.964 | 0.805 | 1.153 |
| KIRP   | 0.142          | 0.259          | 0.716 | 0.441 | 1.163 |
| LHCC   | 0.123          | 0.523          | 0.820 | 0.630 | 1.068 |
| LIUAD  | 0.083          | 0.815          | 0.853 | 0.725 | 1.028 |
| LUSC   | 0.512          | 0.690          | 1.041 | 0.924 | 1.173 |
| STAD   | 0.909          | 0.937          | 0.988 | 0.893 | 1.216 |
| THCA   | 0.105          | 0.322          | 1.546 | 0.938 | 2.549 |
| UCEC   | 3.902e-3       | 0.078          | 0.738 | 0.592 | 0.919 |

Showing 1 to 10 of 10 entries

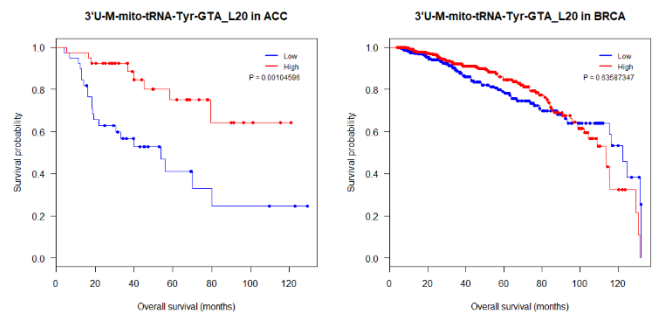

**Figure S4. Survival analysis results and Kaplan-Meier curves of 3'U-M-mito-tRNA-Tyr-GTA\_L20 among cancers.**

**Browse Analysis**

- Differential Expression Analysis
- Survival Analysis
  - IRF
    - Cancer Type
      - ACC
        - 3'-IRF
          - 3'-IRF
          - 5'-IRF
          - I-IRF
      - BLCA
      - BRCA
      - CESC
      - CHOL
      - COAD
      - DLBC
      - ESCA
      - HNSC
      - KICH
      - KIRC
      - KIRP
      - LGG
      - LIHC
      - LUAD
      - LUSC
      - MESO
      - OV
      - PAAD
      - PCPG
      - PRAD
      - READ

### 3'-tRF Survival Analysis in ACC

**Overall Survival Analysis**

Show 10 entries Search:

| tRF ID                    | Logtest Pvalue | Logtest Qvalue | HR    | Lower | Upper |
|---------------------------|----------------|----------------|-------|-------|-------|
| 3'U-mito-tRNA-Val-TAC_L22 | 1.060e-6       | 1.071e-4       | 0.417 | 0.275 | 0.632 |
| 3'U-mito-tRNA-Val-TAC_L24 | 2.620e-6       | 1.323e-4       | 0.436 | 0.295 | 0.645 |
| 3'U-mito-tRNA-Val-TAC_L23 | 1.212e-5       | 4.079e-4       | 0.525 | 0.388 | 0.711 |
| 3'U-mito-tRNA-Val-TAC_L21 | 2.913e-5       | 7.355e-4       | 0.493 | 0.331 | 0.734 |
| 3'U-mito-tRNA-Cys-GCA_L15 | 4.891e-5       | 9.881e-4       | 0.387 | 0.222 | 0.673 |
| 3'U-mito-tRNA-Ile-GAT_L28 | 2.938e-4       | 4.945e-3       | 0.245 | 0.091 | 0.657 |
| 3'U-tRNA-His-GTG-1-7_L25  | 3.902e-4       | 5.630e-3       | 2.635 | 1.621 | 4.283 |
| 3'U-mito-tRNA-Cys-GCA_L23 | 4.702e-4       | 5.937e-3       | 0.632 | 0.481 | 0.831 |
| 3'U-mito-tRNA-Ile-GAT_L29 | 8.729e-4       | 9.796e-3       | 0.636 | 0.463 | 0.874 |
| 3'U-mito-tRNA-Ile-GAT_L22 | 9.724e-4       | 9.821e-3       | 0.550 | 0.367 | 0.825 |

Showing 1 to 10 of 101 entries Previous 1 2 3 4 5 11 Next

**Disease-free Survival Analysis**

Show 10 entries Search:

| tRF ID                    | Logtest Pvalue | Logtest Qvalue | HR    | Lower | Upper |
|---------------------------|----------------|----------------|-------|-------|-------|
| 3'U-mito-tRNA-Val-TAC_L22 | 2.352e-9       | 2.376e-7       | 0.364 | 0.246 | 0.539 |
| 3'U-mito-tRNA-Val-TAC_L21 | 1.484e-8       | 7.494e-7       | 0.385 | 0.257 | 0.577 |
| 3'U-mito-tRNA-Val-TAC_L23 | 4.366e-7       | 1.470e-5       | 0.469 | 0.342 | 0.643 |
| 3'U-mito-tRNA-Val-TAC_L24 | 9.935e-7       | 2.509e-5       | 0.455 | 0.320 | 0.646 |
| 3'U-mito-tRNA-Cys-GCA_L15 | 2.342e-5       | 4.731e-4       | 0.439 | 0.278 | 0.693 |

**Figure S5. Survival analysis results of 3'-tRFs in ACC.**

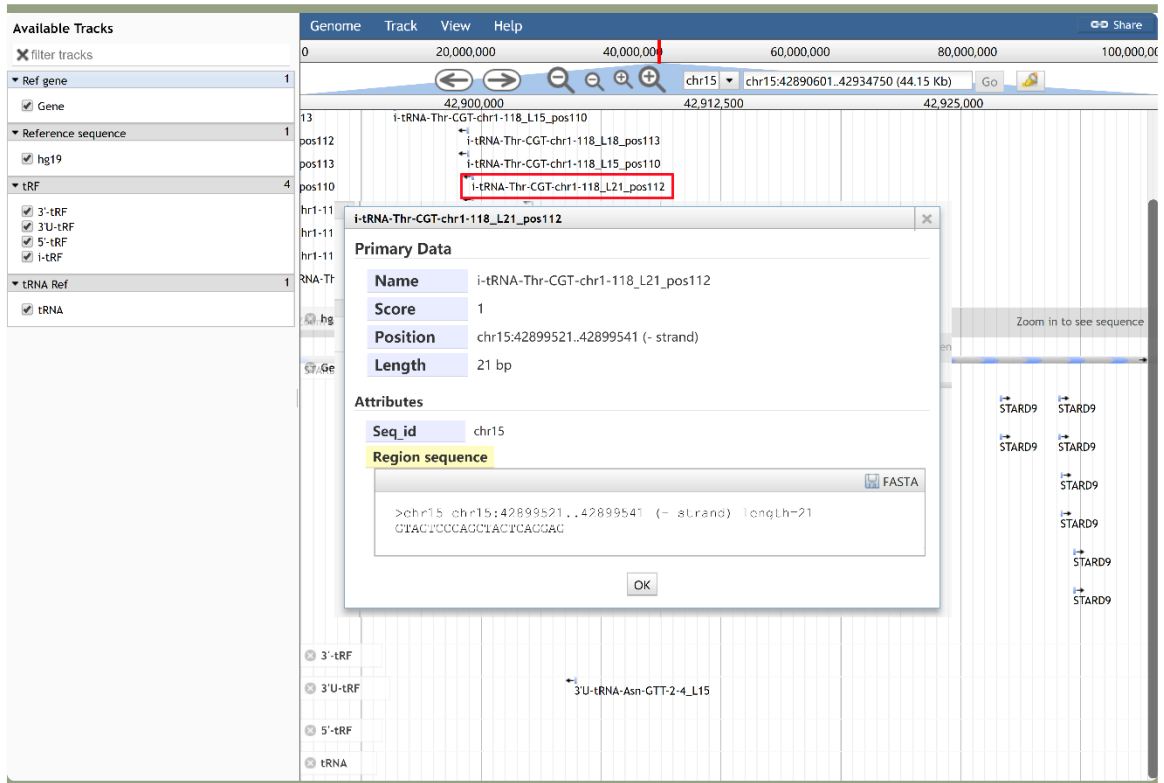

**Figure S6. Example feature tracks of “i-tRNA-Thr-CGT-chr-118\_L21\_pos112” in JBrowse.**

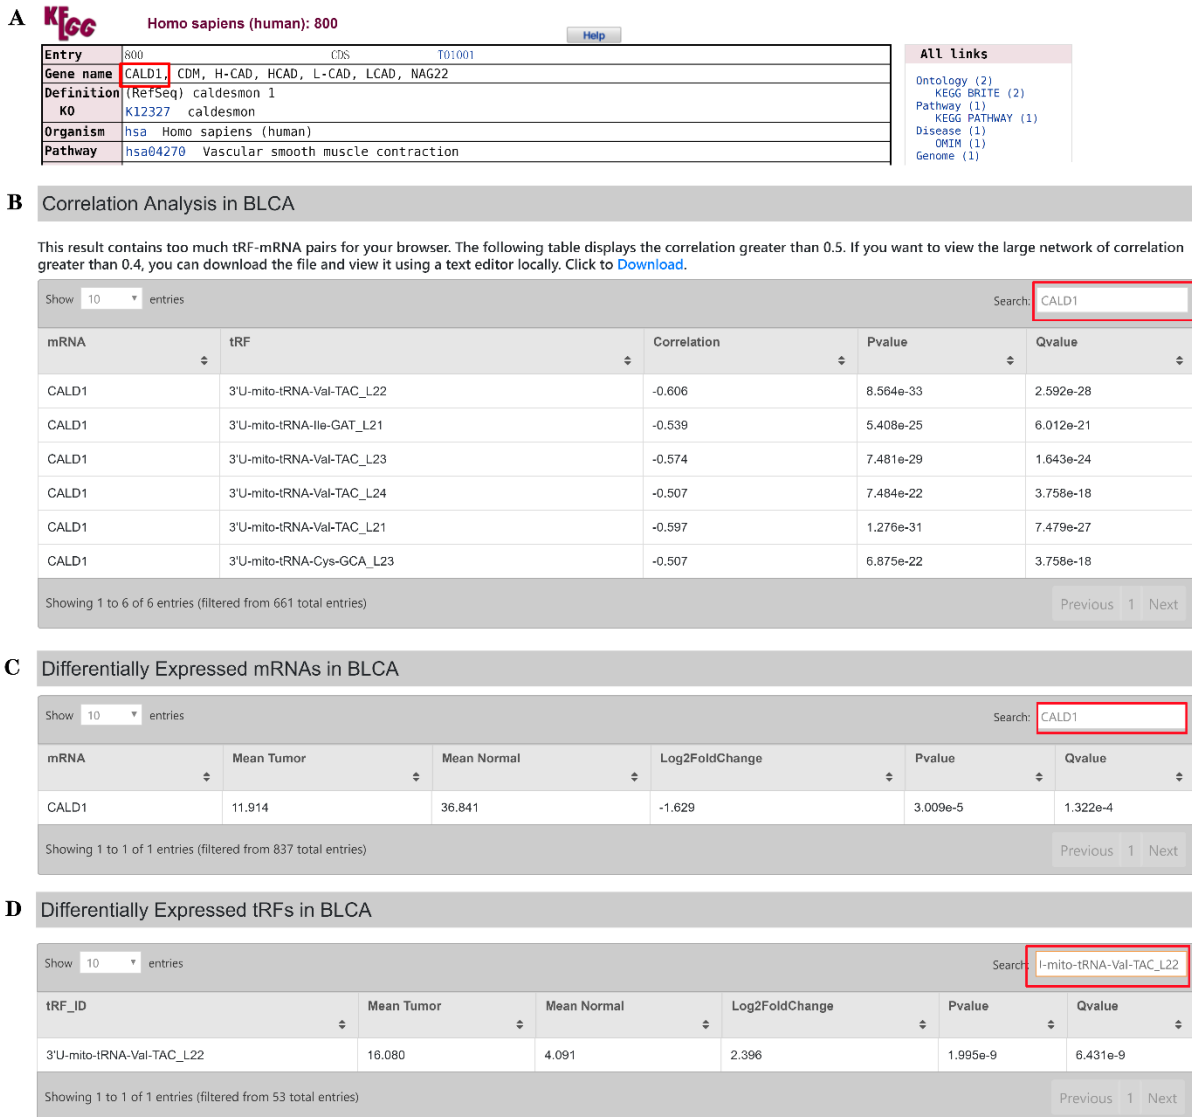

**Figure S7. A case study in BLCA. (A)** General information of gene “CALD1”. **(B)** tRFs correlated with gene “CALD1” in BLCA. **(C)** Differential expression of “CALD1” between tumor and normal tissues in BLCA. **(D)** Differential expression of 3'U-mito-tRNA-Val-TAC\_L22 between tumor and normal tissues in BLCA.



|                | Single source tRNA           | Multiple source tRNA           |
|----------------|------------------------------|--------------------------------|
| <b>3'U-tRF</b> | 3'U-mito-tRNA-Val-TAC_L22    | 3'U-M-tRNA-Gln-CTG-3-2_L23     |
| <b>3'-tRF</b>  | 3'-tRNA-Ala-AGC-1-1_L19      | 3'-M-tRNA-Gly-GCC-2-6_L22      |
| <b>5'-tRF</b>  | 5'-tRNA-Ala-AGC-11-1_L19     | 5'-M-tRNA-Ala-TGC-7-1_L26      |
| <b>i-tRF</b>   | i-tRNA-Ala-AGC-1-1_L21_pos54 | i-M-tRNA-Ala-AGC-1-1_L17_pos58 |

**Figure S8. Nomenclature of tRFs.** First line: 3'U-tRFs. Second line: 3'-tRFs. Third line: 5'-tRFs. Fourth line: i-tRFs. Red font (i.e., 3'U-, 3'-, 5'- and i-) represents a tRF class identifier. Green font (i.e., "M") indicates that the tRF was derived from multiple tRNA genes. Purple font represents a tRNA gene identifier. Black font represents the length of the tRF sequence. Golden font represents start position of an i-tRF on its source tRNA.
